# Supplementary material
Source: PubMed Central journal article supplement (PMC4945499)
Supplement: NIHMS785292-supplement-Supp_Info.pdf [file NIHMS785292-supplement-Supp_Info.pdf]

## **SUPPLEMENTARY INFORMATION**

### **METHODS**

We examined the shape correlation parameter  $Sc$  [16] to see whether there was a correlation between toxin-neutralizing capacity, binding affinity (kD), and shape complementarity within the RTA-VHH interfaces described here. Although shape complementarity was high in all cases, it was not a strong predictor of RTA-neutralization or relative binding affinity. The more potent toxin-neutralizing F5 with an  $IC_{50}$  of 5 nM had a  $K_d$  of  $2.2 \times 10^{-9}$  and a  $Sc$  score of 0.828, while the weaker neutralizing VHH F8 with an  $IC_{50}$  of 300 nM had a similar  $K_d$  of  $0.2 \times 10^{-9}$  despite a similarly high  $Sc$  score of 0.802.

---

**Supplementary Table 1**

---

**Data Collection**

---

|                                 |             |             |
|---------------------------------|-------------|-------------|
| Complex                         | RTA-F5      | RTA-F8      |
| APS Beamline                    | 24-ID-E     | 24-ID-C     |
| $d_{\min}$ (Å)                  | 1.5         | 2.0         |
| wavelength (Å)                  | 0.979       | 0.979       |
| No. of reflections              | 610453      | 880358      |
| Average redundancy <sup>a</sup> | 6.2 (6.2)   | 3.1(2.7)    |
| $(I)/(\delta)^a$                | 13.7(1.5)   | 11.4(0.95)  |
| Completeness <sup>a</sup> (%)   | 99.7 (99.3) | 96.8(98.7)  |
| $R_{\text{merge}}^{a,b}$ (%)    | 8.4(56.5)   | 14.8(214.0) |
| CC* <sup>c</sup>                | 0.79        | 0.61        |

---

**Refinement**

---

|                                                    |                    |                   |
|----------------------------------------------------|--------------------|-------------------|
| Bragg spacings (Å)                                 | 55.1-1.5           | 45.9-2.0          |
| Space group                                        | C222 <sub>1</sub>  | C222 <sub>1</sub> |
| Cell parameters: $a, b, c$ (Å)                     | 78.4, 107.0, 111.9 | 88.5, 91.8, 95.1  |
| $R^d / R_{\text{free}}^e$ (%)                      | 17.8/19.5          | 20.4/25.7         |
| No. of reflections                                 | 145133             | 24964             |
| No. of waters                                      | 372                | 135               |
| Rmsd bond length (Å)                               | 0.019              | 0.006             |
| Rmsd bond angle (°)                                | 1.68               | 1.05              |
| B-factors (Å <sup>2</sup> ): main chain/side chain | 25.1 / 30.1        | 41.4 / 43.9       |
| Ramachandran favored / allowed <sup>f</sup> (%)    | 97.2 / 100.0       | 97.9 / 100.0      |
| PDB code                                           | 4Z9K               | 5E1H              |

---

<sup>a</sup> Values in outermost shell are given in parentheses.

<sup>b</sup>  $R_{\text{merge}} = (\sum |I_i - \langle I_i \rangle|) / \sum I_i$ , where  $I_i$  is the integrated intensity of a given reflection.

<sup>c</sup>  $\text{CC}^* = \frac{2\text{CC}1/2}{1 + \text{CC}1/2}$ , where CC1/2 is the correlation coefficient of two split data sets each derived by averaging half of the observations for a given reflection.

<sup>d</sup>  $R = \sum | |F_o| - |F_c| | / \sum |F_o|$ , where  $F_o$  and  $F_c$  denote observe and calculated structure factors, respectively.

<sup>e</sup>  $R_{\text{free}}$  was calculated using 5% of data excluded from refinement.

<sup>f</sup> Calculated using Molprobity

---

## Figure Legends

**Figure S1. Disulfide bond formation in VHH F5 and VHH F8.** Depicted are the C $\alpha$ -traces of (A) VHH F5 and (B) VHH F8. The CDR3 elements are colored red with the rest of the VHH colored in cyan. The disulfide bonds between residues Cys 22-Cys96 and Cys50-Cys97 in VHH F5 are shown in stick representation and colored magenta. Cysteines 22 and 96 not forming a disulfide bond in VHH F8 are also drawn in stick representation and colored cyan.

**Figure S2. Amino acid sequence alignments of F8 with VHGs G12 and G11.** (A) Sequence alignment of F8 with G12 and (B) F8 with G11. CDR1, 2, and 3 are highlighted with blue, yellow, and red, respectively. Sequence positions of residues involved in the hydrophobic interactions between the CDR3 and FR residues are highlighted with red asterisks above the sequence. Black asterisks below the sequence denote sequence identity. Figure made with ClustalW (jmb ref 51).

**Figure S3. Conserved residues impacting CDR3 configuration.** Shown are the super positioned C $\alpha$ -traces of F8 with (A) four representative structural homologs possessing similarly constrained CDR3 configurations and F8 with (B) four representative structural homologs with a more extended CDR3. The CDR3 element for all homologs are colored dark gray, while the CDR3 elements of F8 is colored red. All VHGs are similarly oriented with the CDR3 in front. Sequence alignment of F8 with (C) the structural homologs in panel A (PDB: **2P42**, **2X1Q**, **4NBX**, **4PPT**) and of F8 with (D) the structural homologs in panel B (PDB: **3EZJ**, **4MQS**, **4X7C**, **4M3J**). CDR 1, 2, and 3 are highlighted blue, yellow, and red, respectively. Residue positions potentially involved in the hydrophobic interactions between the CDR3 and FR residues are highlighted with red asterisks above the sequence. Black asterisks below the sequence denote sequence identity.

# Supplementary Figure 1

A

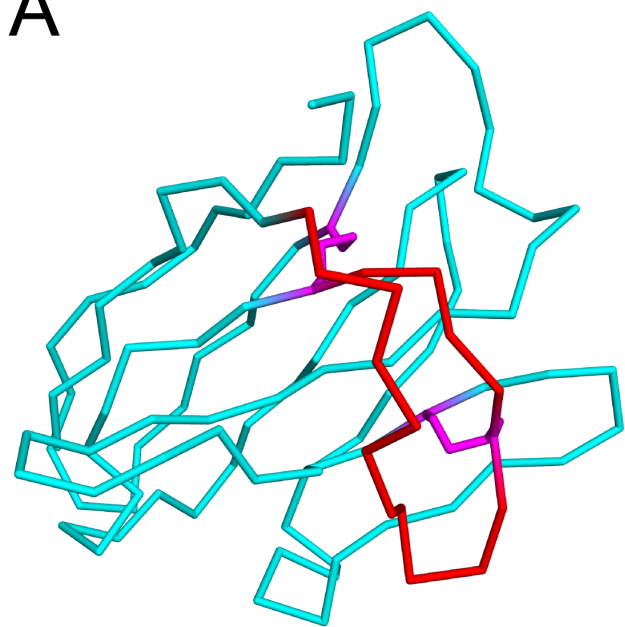

B

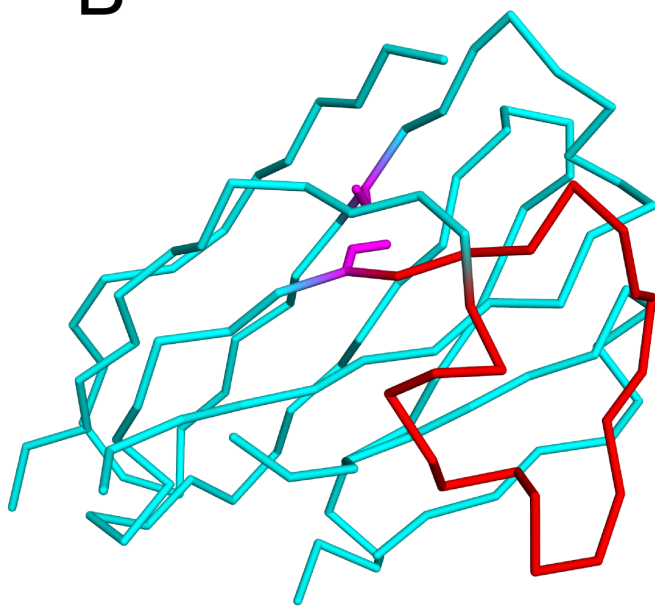



# Supplementary Figure 3

A

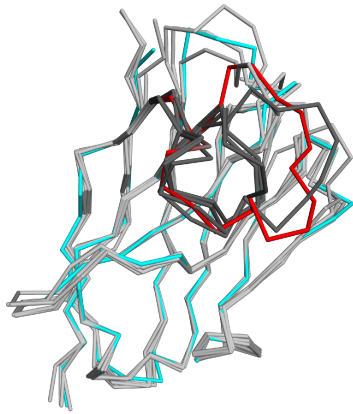

B

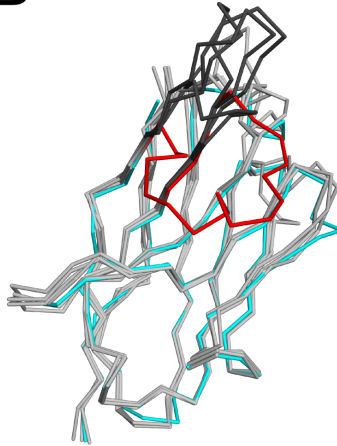

C

```

F8      -----QVQLAETGGGLVQAGGSLRLSCAASGTTFSKNAMAWFRQAPGKEREFVAGINW      53
2P42    ----GSQQLVESGGGLVQAGGSLRLSCAASGYAYTYIYMGWFRQAPGKEREGVAMDS      55
2X1Q    -----QVQLQESGGGLVQPGGSLRLSCAASGRTFSNYRMGWFRQAPGKEREFVATISQ      53
4NBX    QPAMAQAQVQLVESGGGLAQAGGSLRLSCAASGRTFSMDPMAWFRQPPGKEREFVAAGSS      60
4PPT    -----QVQLVESGGGLVQAGGSLRLSCAASGYHPHYLHMGWFRQAPGKEREGVAMDS      53
          **** *:***** * *****
          *                               *

F8      NAVSTNYADSVKGRFTVSRDNAKNTVYLQMNSLKPEDTAVYYCAGSSIYSDISGAATVWA      113
2P42    GGGGTLYADSVKGRFTISRDKGKNTVYLQMDSLKPEDTATYYCLAGGYE-----LRD      107
2X1Q    SGAATAYADSVKGRFTFSRDNAKNTVYLEMLSLPEPTAVYYCAASSRVFYT--EVLQTT      111
4NBX    TGRTTYYADSVKGRFTISRDNKNTVYLQMNSLKPEDTAVYYCAAAPYG-----ANWYR      114
4PPT    GGGGTLYADSVKGRFTISRDKGKNTVYLQMDSLKPEDTATYYCLAGGYE-----LRD      105
          * ***** * *****
          *                               *

F8      TSYNYWGQGTQVTVSSAHHSEDPS----- 137
2P42    RTYGGWGQGTQVTVSS----- 123
2X1Q    TGYDWGQGTQVTVSS----- 127
4NBX    DEYAYWGQGTQVTVSSGQAGQGSEQLISEED 146
4PPT    RTYGHWGQGTQVTVSS----- 121
          * *****
          *                               *
    
```

D

```

F8      ----QVQLAETGGGLVQAGGSLRLSCAASGTTF--SKNAMAWFRQAPGKEREFVAGINW      53
3EZJ    ----QVQLQESGGGLVQAGGSLRLSCAASGSIF--SINSMWDRQAPGKQRELVATITS      53
4MQS    GPGSQVQLQESGGGLVQAGDSLRLSCAASGFDNFDDYAIGWFRQAPGQEREGVSCIDP      60
4X7C    ----DVQLVESGGGLVQPGGSLRLSCAASGSIF--SIYAMGWYRQAPGKQRELVASISS      53
4M3J    ----QVQLQESGGGLVQPGGSLRLSCAASGSIS--SITTMGWYRQDPGKQRELVALINS      53
          **** *:***** * *****
          *                               *

F8      NAVSTNYADSVKGRFTVSRDNAKNTVYLQMNSLKPEDTAVYYCAGSSIYSDISGAATVWA      113
3EZJ    -GGSTTNYADSVKGRFTISRDNKNTVYLQMNSLKPEDTAVYYCNANVK-----TWAG      104
4MQS    SDGSTIYADSAKGRFTISSDNAENTVYLQMNSLKPEDTAVYYCSAWTLF-----      109
4X7C    -GGGTNYADSVKGRFTISGDNAKNTVYLQMNSLKPEDTAVYYCKREDY-----SAYA      104
4M3J    -VGDTTYAGSVKGRFTISRDNKNTVYLEMSSLKPEDTAVYYCNAFMS-----TNSG      104
          * ** * ***** * *****
          *                               *

F8      TSYNYWGQGTQVTVSSAHHSEDPS 137
3EZJ    NTRDYWGQGTQVTVSS----- 119
4MQS    HSDEYWGQGTQVTVSS----- 125
4X7C    PPSGSRGRGTQVTVSS----- 119
4M3J    RTGSHWGQGTQVTVSS----- 119
          * *****
          *                               *
    
```
